# Supplementary material for: Boron-based tubular BeB12+and quasi-planar BeB120/−clusters: structural transformation and chemical bonding
Source: Royal Society of Chemistry journal article supplement (doi:10.1039/d2nj04951a), 2022-12-20
Supplement: d2nj04951a1.pdf [file d2nj04951a1.pdf]

## SUPPLEMENTARY INFORMATION

### Boron-based tubular $\text{BeB}_{12}^+$ and quasi-planar $\text{BeB}_{12}^{0/-}$ clusters: structural transformation and chemical bonding†

Lin-Yan Feng,\* Ying-Jin Wang, Xiao-Bo Hu, Chang-Qing Miao, Miao Yan, and Yan Gao

*Department of Chemistry, Xinzhou Teachers University, Xinzhou 034000, Shanxi, China*

\*E-mail: fengliny@sxu.edu.cn

**Table S1.** Cartesian coordinates for the global-minimum (GM) structures of  $\text{BeB}_{12}^{-/0/+}$  clusters at the PBE0/6-311+G (d) level.

**Figure S1.** Alternative low-lying structures of  $\text{BeB}_{12}^+$  cluster at the PBE0-D3/6-311+G(d) level. Relative energies are shown with corrections for zero-point energies (ZPEs). Also shown are energies for top ten low-lying isomers at the single-point CCSD(T)/6-311+G(d) level in square brackets. All energies are in kcal mol<sup>-1</sup>.

**Figure S2.** Alternative low-lying structures of  $\text{BeB}_{12}$  cluster at the PBE0-D3/6-311+G(d) level. Relative energies are shown with corrections for zero-point energies (ZPEs). Also shown are energies for top low-lying isomers at the single-point CCSD(T)/6-311+G(d) level in square brackets. All energies are in kcal mol<sup>-1</sup>.

**Figure S3.** Alternative low-lying structures of  $\text{BeB}_{12}^-$  cluster at the PBE0-D3/6-311+G(d) level. Relative energies are shown with corrections for zero-point energies (ZPEs). Also shown are energies for top low-lying isomers at the single-point CCSD(T)/6-311+G(d) level in square brackets. All energies are in kcal mol<sup>-1</sup>.

- Figure S4.** Calculated Wiberg bond indices (WBIs; in blue color) and natural atomic charges (in  $|e|$ ; red color) at the PBE0/6-311+G(d) level. (a) Cationic  $\text{BeB}_{12}^+$  (**1**,  $C_{6v}$ ,  $^2A_1$ ) cluster. (b) Neutral  $\text{BeB}_{12}$  (**2**,  $C_s$ ,  $^1A'$ ) cluster. (c) Anionic  $\text{BeB}_{12}^-$  (**3**,  $C_{2v}$ ,  $^2A_2$ ) cluster.
- Figure S5.** Calculated (a) bond distances (in Å; black color), (b) Wiberg bond indices (WBIs; blue color), and (c) natural atomic charges (in  $|e|$ ; red color) of a local minimum structure for  $\text{BeB}_{12}$  cluster.
- Figure S6.** An alternative AdNDP bonding scheme of tubular  $\text{BeB}_{12}^+$  cluster, in which the contribution of third B atom is excluded. The occupation numbers (ONs) are slightly less than those in delocalized 3c-2e  $\sigma$  scheme (in Fig. 3).
- Figure S7.** The occupied canonical molecular orbital (CMOs) of neutral  $\text{BeB}_{12}$  (**2**,  $C_s$ ,  $^1A'$ ). (a) Three delocalized  $\pi$  bonds. (b) Five delocalized  $\sigma$  bonds. (c) One delocalized  $\sigma$  bond in the  $\text{BeB}_2$  core. (d) Ten delocalized  $\sigma$  bonds for peripheral two-center two-electron (2c-2e) B–B single bonds.
- Figure S8.** AdNDP bonding analysis of LM ( $C_s$ ,  $^1A'$ ) structure for neutral  $\text{BeB}_{12}$ . The ON are indicated.
- Figure S9.** Selected optimized structures at PBE0-D3/6-311+G(d) level for (a) GM  $\text{BeB}_{12}^+$  (**1**,  $C_{6v}$ ,  $^2A_1$ ); (b) LM  $\text{LiB}_{12}$  ( $C_{2v}$ ,  $^2A'$ ), and (c) GM  $\text{Li}_2\text{B}_{12}$  ( $D_{6d}$ ,  $^1A_1$ ). Bond distances (in Å) are shown.
- Figure S10.** The displacement vectors of soft vibrational modes of neutral  $\text{BeB}_{12}$  cluster (a) global-minimum (GM) and (b) transition state (TS) structure at PBE0-D3/6-311+G(d) level, which relevant to the rotation between the peripheral  $\text{B}_{10}$  and inner  $\text{BeB}_2$  core.

**Figure S1.** Alternative low-lying structures of  $\text{BeB}_{12}^+$  cluster at the PBE0-D3/6-311+G(d) level. Relative energies are shown with corrections for zero-point energies (ZPEs). Also shown are energies for top ten low-lying isomers at the single-point CCSD(T)/6-311+G(d) level in square brackets. All energies are in  $\text{kcal mol}^{-1}$ .

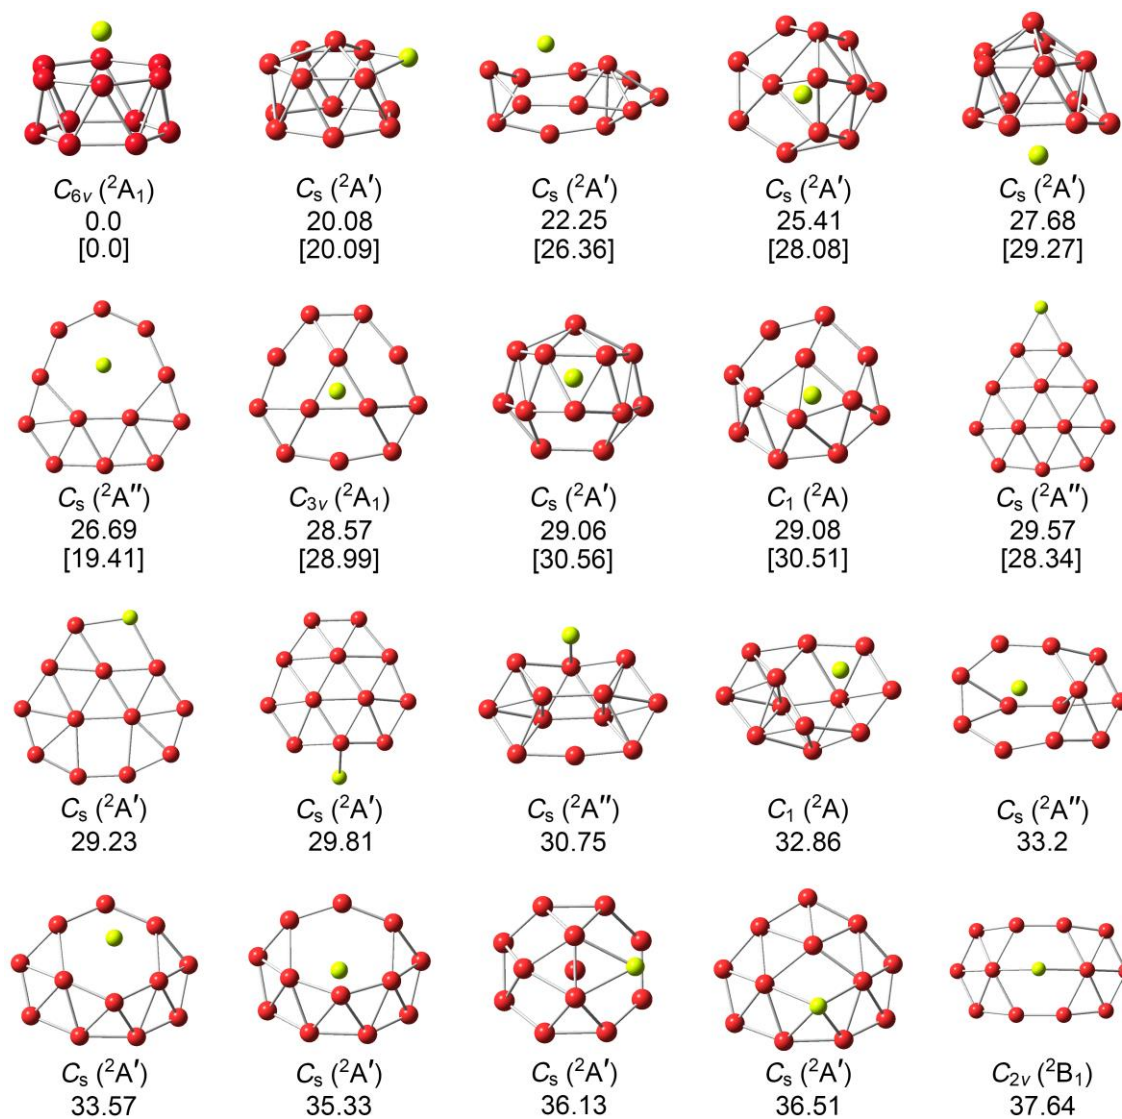

**Figure S2.** Alternative low-lying structures of BeB<sub>12</sub> cluster at the PBE0-D3/6-311+G(d) level. Relative energies are shown with corrections for zero-point energies (ZPEs). Also shown are energies for top low-lying isomers at the single-point CCSD(T)/6-311+G(d) level in square brackets. All energies are in kcal mol<sup>-1</sup>.

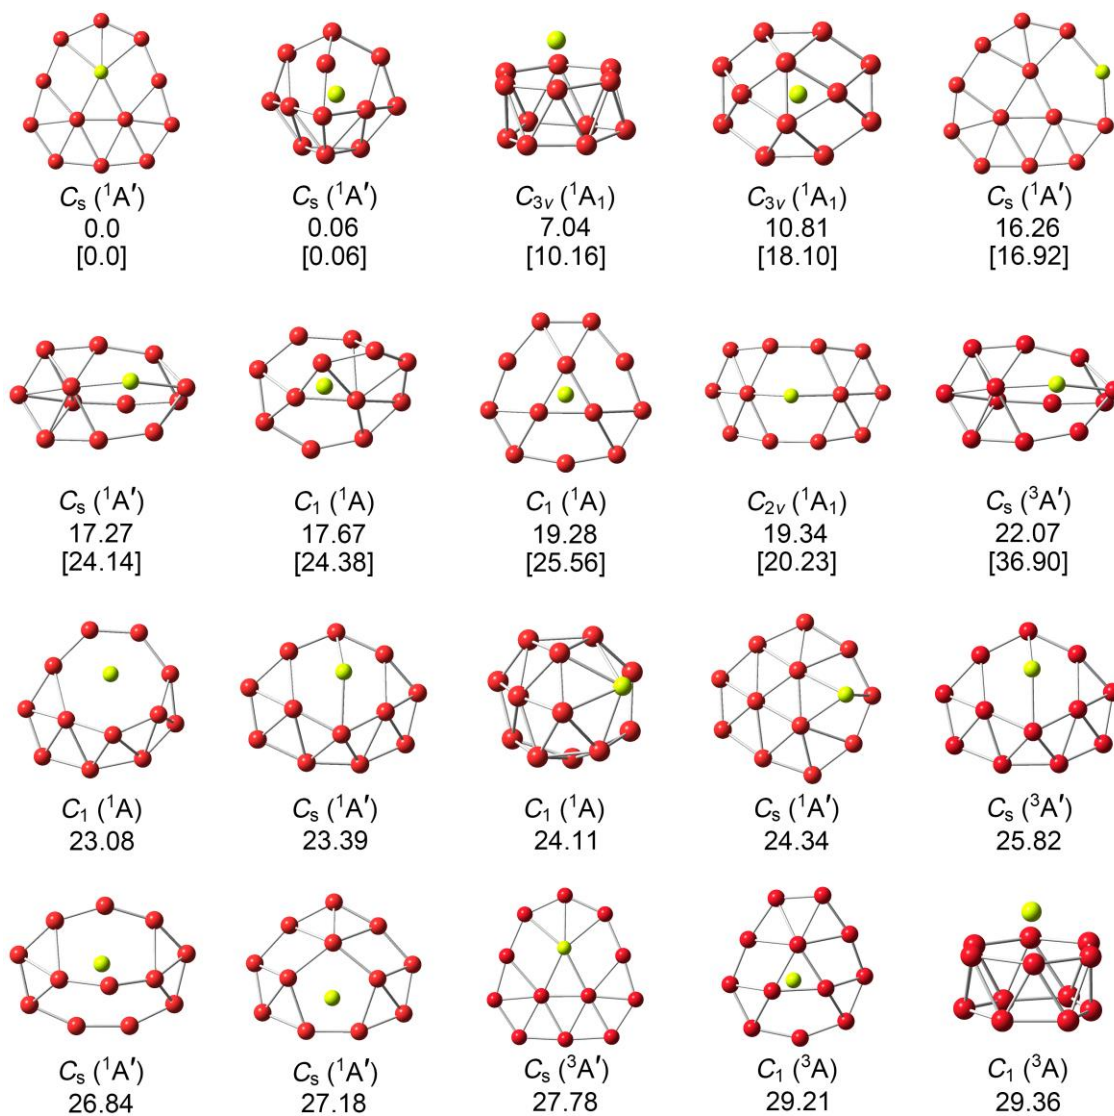

**Figure S3.** Alternative low-lying structures of  $\text{BeB}_{12}^-$  cluster at the PBE0-D3/6-311+G(d) level. Relative energies are shown with corrections for zero-point energies (ZPEs). Also shown are energies for top low-lying isomers at the single-point CCSD(T)/6-311+G(d) level in square brackets. All energies are in  $\text{kcal mol}^{-1}$ .

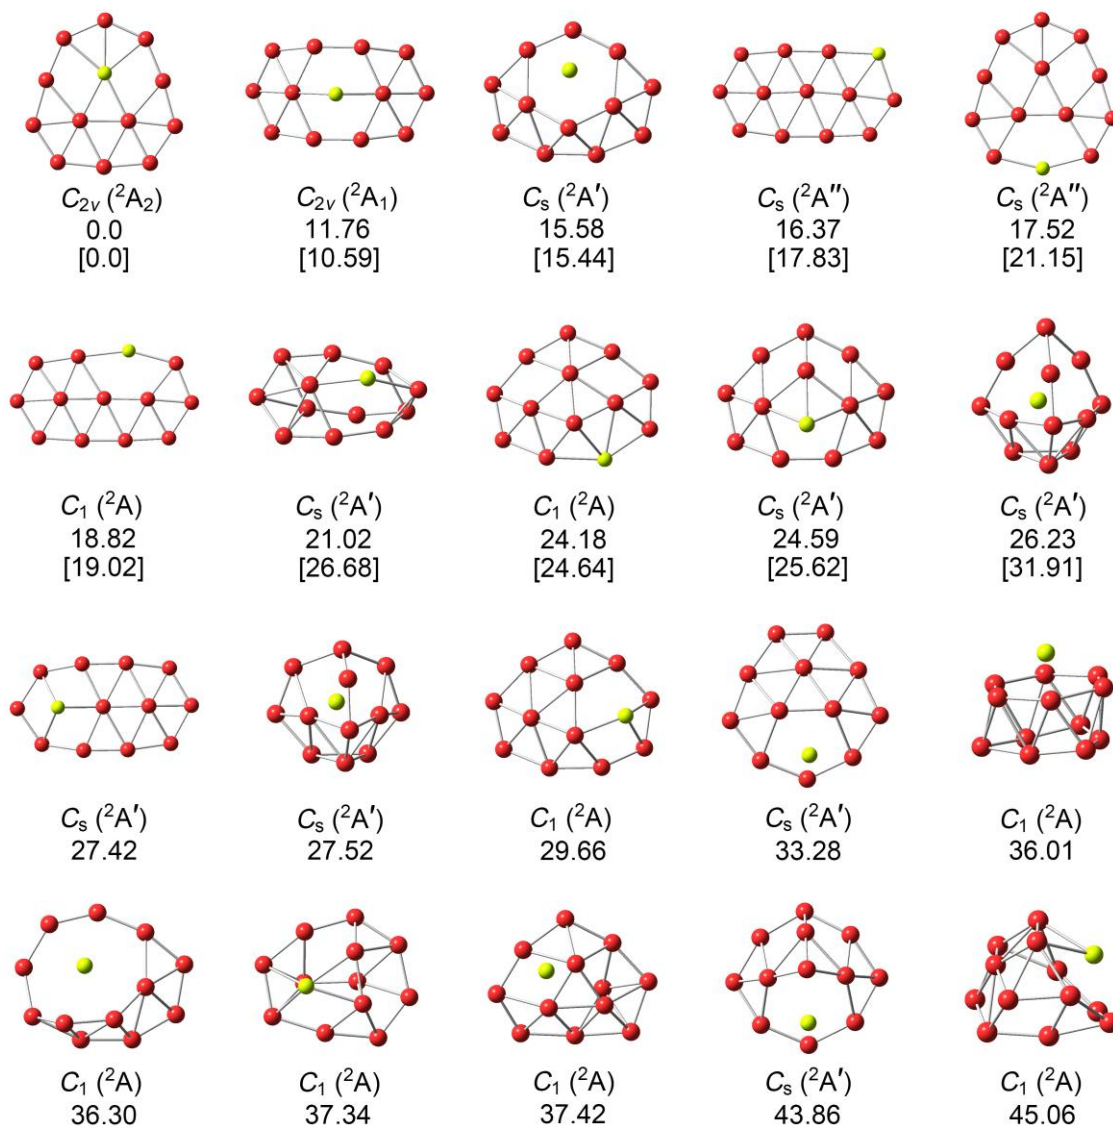

**Figure S4.** Calculated Wiberg bond indices (WBIs; in blue color) and natural atomic charges (in |e|; red color) at the PBE0/6-311+G(d) level. (a) Cationic  $\text{BeB}_{12}^+$  (**1**,  $C_{2v}$ ,  $^2A_1$ ) cluster. (b) Neutral  $\text{BeB}_{12}$  (**2**,  $C_s$ ,  $^1A'$ ) cluster. (c) Anionic  $\text{BeB}_{12}^-$  (**3**,  $C_{2v}$ ,  $^2A_2$ ) cluster.

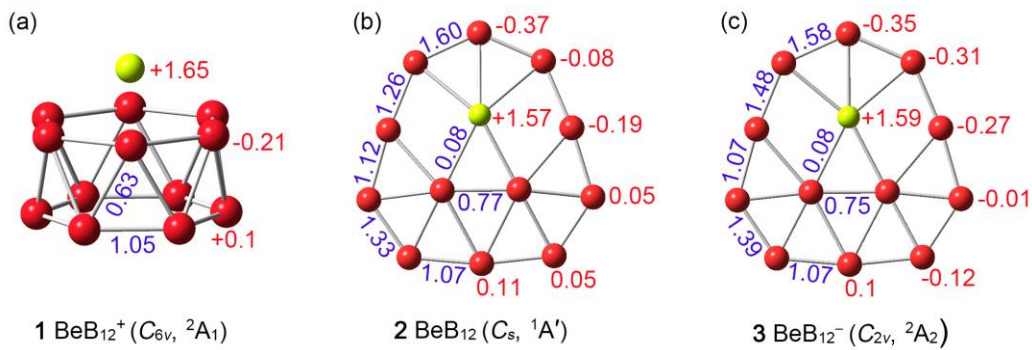

**Figure S5.** Calculated (a) bond distances (in Å; black color), (b) Wiberg bond indices (WBIs; blue color), and (c) natural atomic charges (in |e|; red color) of a local minimum (LM) structure for BeB<sub>12</sub> cluster.

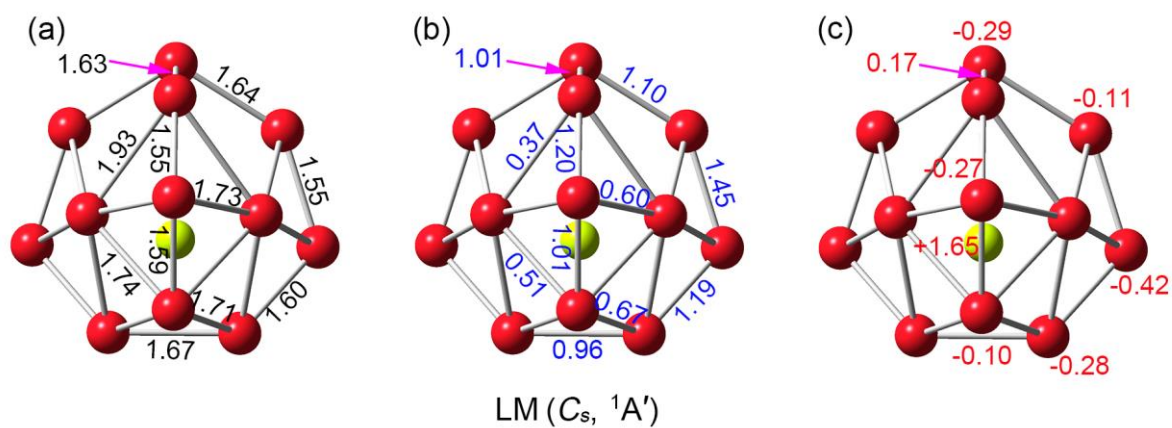

**Figure S6.** An alternative AdNDP bonding scheme of tubular  $\text{BeB}_{12}^+$  cluster, in which the contribution of third B atom is excluded. The occupation numbers (ONs) are slightly less than those in delocalized  $3c-2e$   $\sigma$  scheme (in Fig. 3).

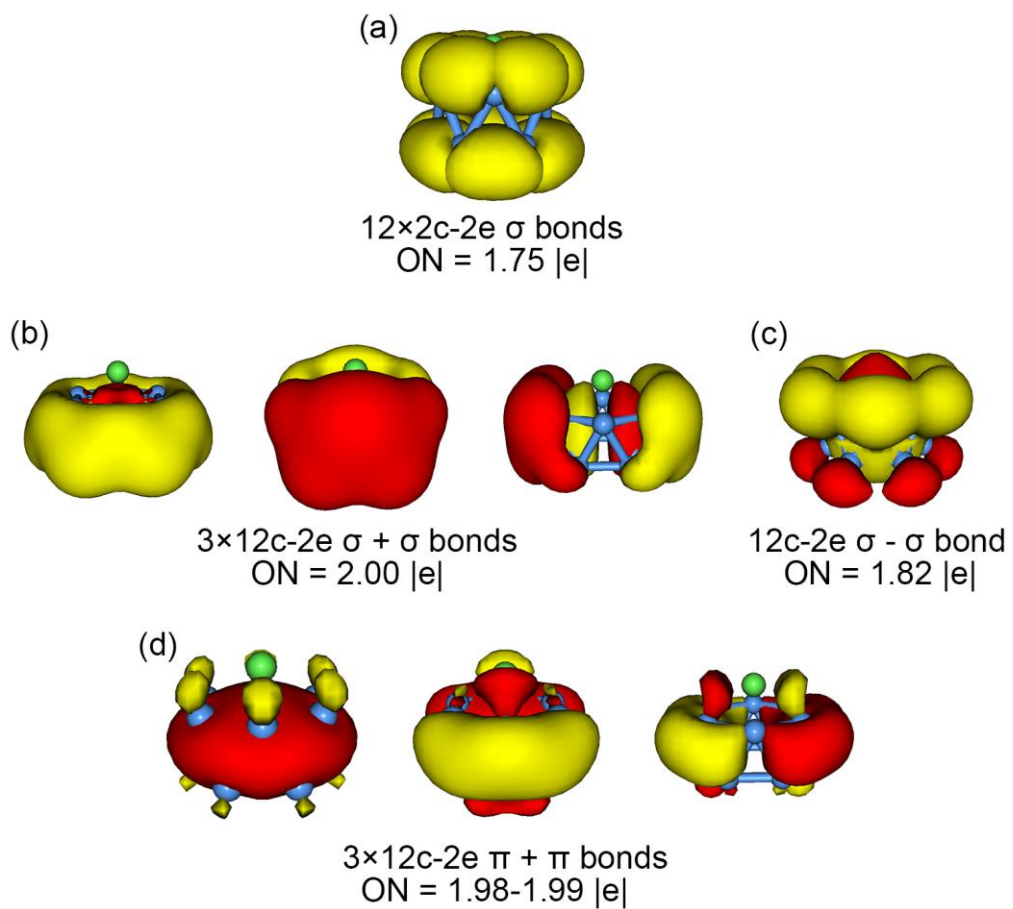



**Figure S7.** The occupied canonical molecular orbital (CMOs) of neutral  $\text{BeB}_{12}$  (**2**,  $C_s$ ,  $^1A'$ ). (a) Three delocalized  $\pi$  bonds. (b) Five delocalized  $\sigma$  bonds. (c) One delocalized  $\sigma$  bond in the  $\text{BeB}_2$  core. (d) Ten delocalized  $\sigma$  bonds for peripheral two-center two-electron (2c-2e) B–B single bonds.

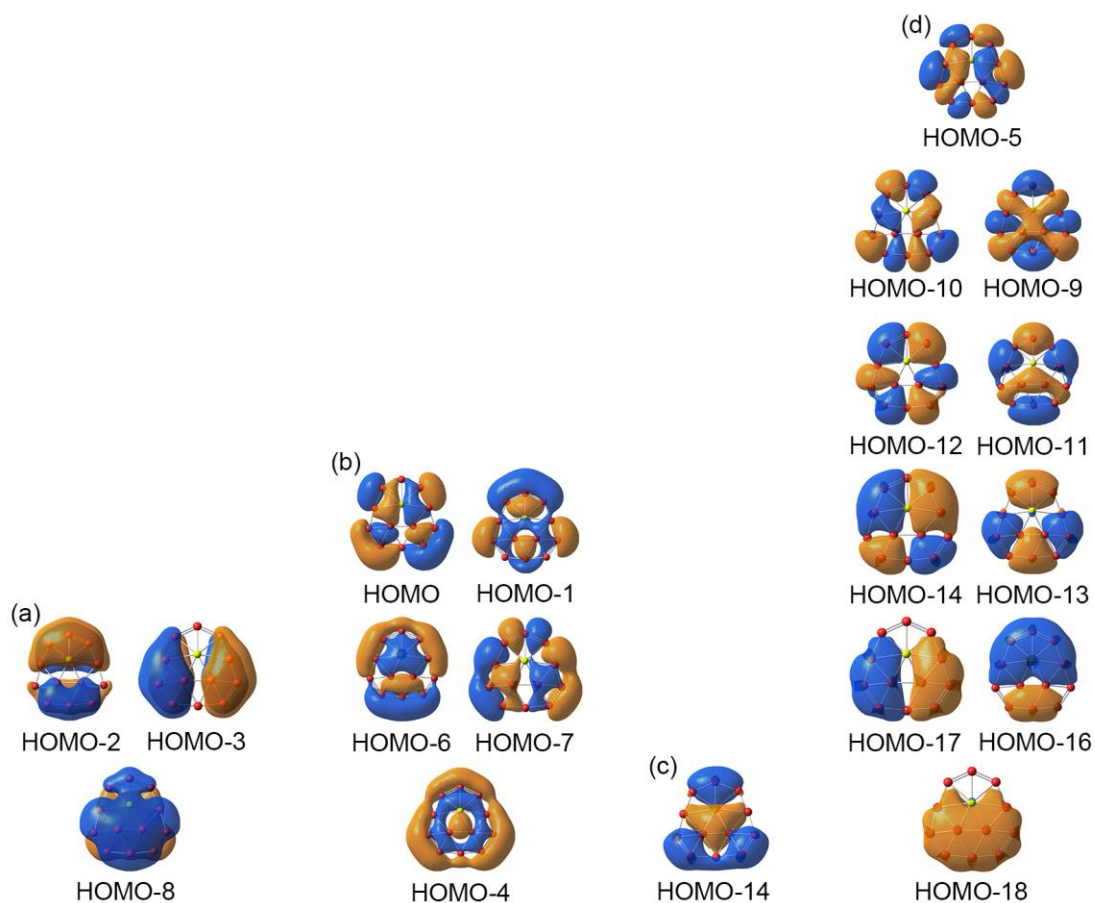

**Figure S8.** AdNDP bonding analysis of LM ( $C_s$ ,  $^1A'$ ) structure for neutral  $BeB_{12}$ . The ON are indicated.

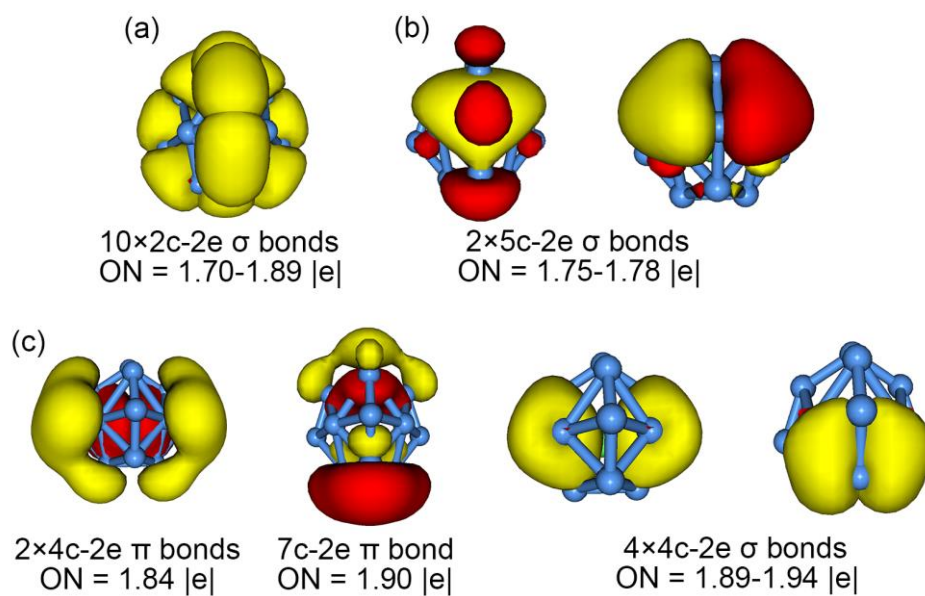

**Figure S9.** Selected optimized structures at PBE0-D3/6-311+G(d) level for (a) GM  $\text{BeB}_{12}^+$  ( $\mathbf{1}$ ,  $C_{6v}$ ,  $^2A_1$ ); (b) LM  $\text{LiB}_{12}$  ( $C_{2v}$ ,  $^2A'$ ), and (c) GM  $\text{Li}_2\text{B}_{12}$  ( $D_{6d}$ ,  $^1A_1$ ). Bond distances (in Å) are shown.

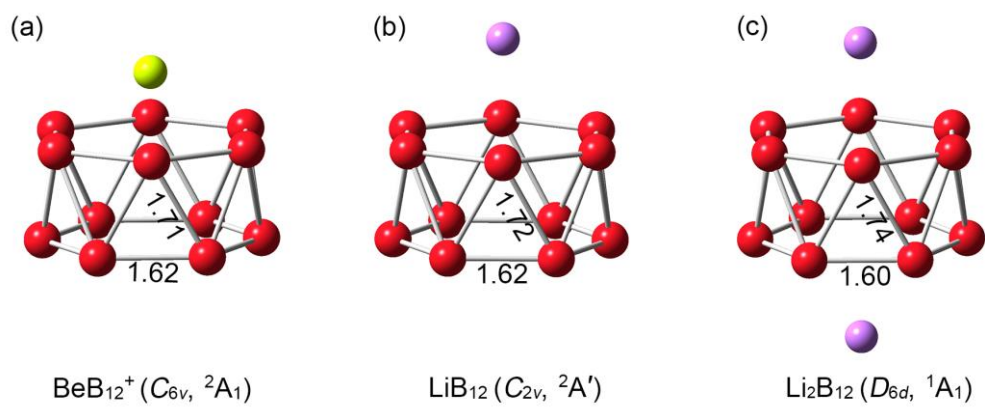

**Figure S10.** The displacement vectors of soft vibrational modes of neutral BeB<sub>12</sub> cluster (a) global-minimum (GM) and (b) transition state (TS) structure at PBE0-D3/6-311+G(d) level, which relevant to the rotation between the peripheral B<sub>10</sub> and inner BeB<sub>2</sub> core.

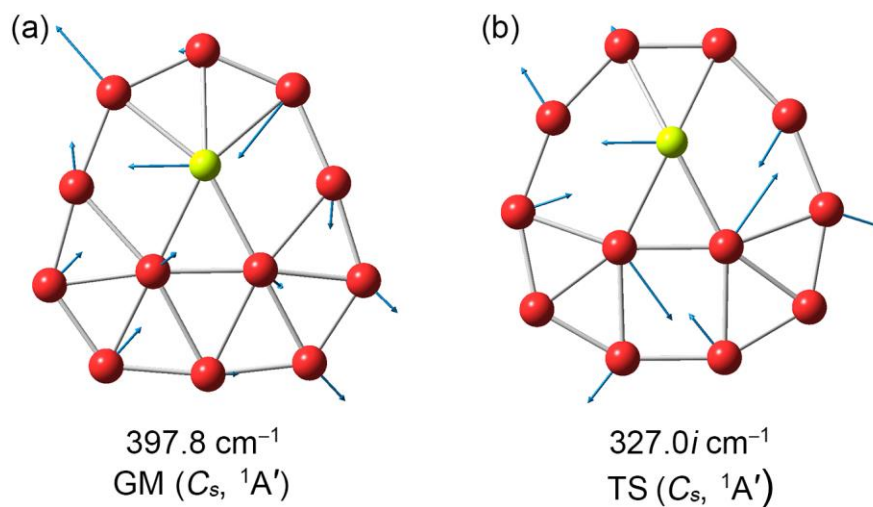

**Table S1.** Cartesian coordinates for the global-minimum (GM) structures of  $\text{BeB}_{12}^{-/0/+}$  clusters at the PBE0/6-311+G (d) level.

(a)  $\text{BeB}_{12}^+$  (**1**,  $C_{6v}$ ,  $^2A_1$ )

|    |             |             |             |
|----|-------------|-------------|-------------|
| B  | 0.00000000  | 1.61887800  | 0.63578400  |
| B  | -1.61599500 | 0.00000000  | -0.85526500 |
| B  | 0.80794900  | 1.39950200  | -0.85517100 |
| B  | 0.00000000  | -1.61887800 | 0.63578400  |
| B  | 1.40171300  | -0.80928300 | 0.63574100  |
| B  | -1.40171300 | -0.80928300 | 0.63574100  |
| B  | -0.80794900 | 1.39950200  | -0.85517100 |
| Be | 0.00000000  | 0.00000000  | 1.64585000  |
| B  | -1.40171300 | 0.80928300  | 0.63574100  |
| B  | -0.80794900 | -1.39950200 | -0.85517100 |
| B  | 0.80794900  | -1.39950200 | -0.85517100 |
| B  | 1.40171300  | 0.80928300  | 0.63574100  |
| B  | 1.61599500  | 0.00000000  | -0.85526500 |

(b)  $\text{BeB}_{12}$  (**2**,  $C_s$ ,  $^1A'$ )

|   |             |             |             |
|---|-------------|-------------|-------------|
| B | -0.09892000 | -2.10072200 | 1.59815500  |
| B | 0.00847200  | 0.70463100  | 2.02077600  |
| B | -0.09949000 | 2.81892400  | 0.00000000  |
| B | 0.00847200  | 0.70463100  | -2.02077600 |

|    |             |             |             |
|----|-------------|-------------|-------------|
| B  | -0.09892000 | -2.10072200 | -1.59815500 |
| B  | -0.06286900 | -0.82152300 | -2.46756800 |
| B  | -0.05718900 | -2.25625300 | 0.00000000  |
| B  | -0.06286900 | -0.82152300 | 2.46756800  |
| B  | -0.08228900 | 2.18191100  | 1.40791900  |
| B  | 0.19697200  | -0.64598400 | -0.84437800 |
| B  | 0.19697200  | -0.64598400 | 0.84437800  |
| B  | -0.08228900 | 2.18191100  | -1.40791900 |
| Be | 0.29243400  | 1.00087800  | 0.00000000  |

(c)  $\text{BeB}_{12}^-$  (**3**,  $C_{2v}$ ,  $^2A_2$ )

|   |            |             |             |
|---|------------|-------------|-------------|
| B | 0.00000000 | 1.60891400  | -2.11192300 |
| B | 0.00000000 | 0.00000000  | -2.26160400 |
| B | 0.00000000 | 1.42677500  | 2.18750700  |
| B | 0.00000000 | -1.60891400 | -2.11192300 |
| B | 0.00000000 | 2.46807400  | -0.82713700 |
| B | 0.00000000 | -2.46807400 | -0.82713700 |
| B | 0.00000000 | 2.03265900  | 0.73446100  |
| B | 0.00000000 | -0.84383500 | -0.66035900 |
| B | 0.00000000 | 0.84383500  | -0.66035900 |
| B | 0.00000000 | -2.03265900 | 0.73446100  |
| B | 0.00000000 | -1.42677500 | 2.18750700  |
| B | 0.00000000 | 0.00000000  | 2.82480200  |
| B | 0.00000000 | 0.00000000  | 0.98963100  |
